# Supplementary material
Source: HighWire-hosted journal article supplement (http://www.cmajopen.ca/highwire/filestream/85271/field_highwire_adjunct_files/0/2020-0024-1-at.pdf)
Supplement: 2020-0024-1-at.pdf [file 2020-0024-1-at.pdf]

| <b>Supplementary Table:</b> Rate of health care use for very high morbidity (RUB=5) Casey House clients and Ontario residents with HIV per person-year in the year preceding admission/index date and the year following discharge/index date compared using negative binomial regression                     |                             |                      |         |         |                                       |                                    |         |         |
|---------------------------------------------------------------------------------------------------------------------------------------------------------------------------------------------------------------------------------------------------------------------------------------------------------------|-----------------------------|----------------------|---------|---------|---------------------------------------|------------------------------------|---------|---------|
| Rate of Health Care Utilization (events per person-year)                                                                                                                                                                                                                                                      | Casey House clients (n=210) |                      |         |         | Ontario residents with HIV (n=3156)   |                                    |         |         |
|                                                                                                                                                                                                                                                                                                               | 1 yr prior to admission     | 1 yr after discharge | Change* | p-value | 1 yr prior to Admission/ index date** | 1 yr after discharge /index date** | Change* | p-value |
| Inpatient hospitalizations                                                                                                                                                                                                                                                                                    | 1.6                         | 1.2                  | - 0.4   | 0.18    | 0.6                                   | 0.4                                | -0.2    | <0.0001 |
| Emergency department visits                                                                                                                                                                                                                                                                                   | 5.4                         | 2.8                  | -2.6    | 0.02    | 2.6                                   | 1.8                                | -0.8    | <0.0001 |
| Physician visits                                                                                                                                                                                                                                                                                              | 81.7                        | 64.0                 | -17.7   | 0.15    | 41.7                                  | 33.4                               | -8.3    | 0.0002  |
| General practitioner                                                                                                                                                                                                                                                                                          | 20.1                        | 24.1                 | +4.0    | 0.0006  | 15.9                                  | 14.1                               | +1.8    | <0.0001 |
| Specialists                                                                                                                                                                                                                                                                                                   | 54.7                        | 34.9                 | -19.8   | 0.52    | 23.0                                  | 16.6                               | +6.4    | 0.0001  |
| Home care services                                                                                                                                                                                                                                                                                            | 28.0                        | 38.8                 | +10.8   | 0.05    | 12.2                                  | 12.6                               | +0.4    | 0.53    |
| * Change = Health care utilization rate (per person-year) for the year prior to admission/index date minus health care utilization rate (per person-year) for the year after discharge/index date<br>**Index dates were randomly assigned based on the distribution of admission dates of Casey House clients |                             |                      |         |         |                                       |                                    |         |         |
